# Supplementary material for: A Coclinical Radiogenomic Validation Study: Conserved Magnetic Resonance Radiomic Appearance of Periostin-Expressing Glioblastoma in Patients and Xenograft Models
Source: Oxford University Press journal article supplement (doi:10.1158/1078-0432.ccr-17-3420), 2018-07-27
Supplement: 10780432ccr173420-sup-192500_3_supp_4876426_pbgq4q.docx [file 10780432ccr173420-sup-192500_3_supp_4876426_pbgq4q.docx]

**Supplementary Table 1a**: Summary table for TCGA and Rembrandt patient MRI parameters such slice thickness/gap, field strength, and in-plane voxel size.

|  | TCGA (N=79 patients) | |
| --- | --- | --- |
| Scanner Strength (Tesla)  1.0  1.5  3.0  Not Available | 1 (1.26%)  47 (59.4%)  26 (32.9%)  5 (6.32%) | |
|  | **AX T1 POST** | **AX FLAIR** |
| In-plane Voxel size (mm) | 0.430 – 1.016 | 0.410 – 0.977 |
| Slice Thickness (mm) | 1.000 – 8.249 | 2.500 – 8.250 |
| Gap (mm) | 1.000 – 7.500 (9 Not Available) | 2.000 – 7.500 (4 Not Available) |

|  | Rembrandt (N=14patients) | |
| --- | --- | --- |
| Scanner Strength (Tesla)  1.5  Not Available | 10 (71.5%)  4 (28.5%) | |
|  | **AX T1 POST** | **AX FLAIR** |
| In-plane Voxel size (mm) | 0.781 – 0.987 | 0.429 – 0.938 |
| Slice Thickness (mm) | 3.000 – 5.200 | 3.000 – 5.000 |
| Gap (mm) | 2.500 – 7.500 | 2.500 – 6.000 |

**Supplementary Table 1b:** Per patient summary table for TCGA and Rembrandt patient MRI parameters such slice thickness/gap, field strength, and in-plane voxel size.

| ID | Magnetic Field | AX T1 POST | | | AX FLAIR | | |
| --- | --- | --- | --- | --- | --- | --- | --- |
| **Strength (Tesla)** | **Gap (mm)** | **in plane voxel size (mm)** | **slice thickness (mm)** | **Gap (mm)** | **in plane voxel size (mm)** | **slice thickness (mm)** |
| 1 | 1.49 | 1 | 0.859375 | 7.4999986 | 2.5 | 0.8984375 | 7.5 |
| 2 | 1.5 | 1.5 | 1.015625 | 1.5 | 5 | 0.859375 | 5 |
| 3 | 1.49 | 2 | 0.9375 | 7.0000081 | 2 | 0.9375 | 7.0000081 |
| 4 | 3 | 2.5 | 0.4688 | 1 | 2.5 | 0.4688 | 2.5 |
| 5 | 3 | 2.5 | 0.46875 | 2.5 | 2.5 | 0.46875 | 2.5 |
| 6 | 3 | 2.5 | 0.46875 | 2.5 | 2.5 | 0.46875 | 2.5 |
| 7 | 3 | 2.5 | 0.4688 | 2.5 | 2.5 | 0.4688 | 2.5 |
| 8 | 3 | 2.5 | 0.4688 | 2.5 | 2.5 | 0.4688 | 2.5 |
| 9 | 3 | 2.5 | 0.4688 | 2.5 | 2.5 | 0.4688 | 2.5 |
| 10 | 3 | 2.5 | 0.4688 | 2.5 | 2.5 | 0.4688 | 2.5 |
| 11 | 3 | 2.5 | 0.4688 | 2.5 | 2.5 | 0.4688 | 2.5 |
| 12 | 3 | 2.5 | 0.4688 | 2.5 | 2.5 | 0.4688 | 2.5 |
| 13 | 3 | 2.5 | 0.4688 | 2.5 | 2.5 | 0.4688 | 2.5 |
| 14 | 3 | 2.5 | 0.4688 | 2.5 | 2.5 | 0.4688 | 2.5 |
| 15 | 3 | 2.5 | 0.4688 | 2.5 | 2.5 | 0.4688 | 2.5 |
| 16 | 1.5 | 2.5 | 0.9375 | 2.5 | 2.5 | 0.9375 | 2.5 |
| 17 | 1.5 | 2.5 | 0.9375 | 2.5 | 2.5 | 0.9375 | 2.5 |
| 18 | 1.5 | 2.5 | 0.9375 | 2.5 | 2.5 | 0.9375 | 2.5 |
| 19 | 1.5 | 2.5 | 0.9375 | 2.5 | 2.5 | 0.9375 | 2.5 |
| 20 | 1.5 | 2.5 | 0.9375 | 2.5 | 2.5 | 0.9375 | 2.5 |
| 21 | 1.49 | 2.5 | 0.859375 | 7.5 | 2.5 | 0.8203125 | 7.5 |
| 22 | 1.49 | 2.5 | 0.859375 | 7.5000038 | 2.5 | 0.859375 | 7.5 |
| 23 | 1.5 | 3 | 0.9375 | 3 | 3 | 0.9375 | 3 |
| 24 | 1.5 | 3 | 0.9375 | 3 | 3 | 0.9375 | 3 |
| 25 | 1.5 | 3 | 0.9375 | 3 | 3 | 0.9375 | 3 |
| 26 | 1.5 | 3 | 0.9375 | 3 | 3 | 0.9375 | 3 |
| 27 | NA | 3 | 0.938 | 3 | 3 | 0.938 | 3 |
| 28 | 3 | 4.52 | 0.71875 | 4.5200028 | 4.52 | 0.8984375 | 4.5200028 |
| 29 | 3 | 5 | 0.4688 | 2.5 | 2.5 | 0.4688 | 2.5 |
| 30 | 3 | 5 | 0.4688 | 5 | 2.5 | 0.4688 | 2.5 |
| 31 | 3 | 5 | 0.4688 | 5 | 2.5 | 0.4688 | 2.5 |
| 32 | 3 | 5 | 0.75 | 5 | 6 | 0.6818182 | 5.9999938 |
| 33 | 3 | 5 | 0.71875 | 5.0000014 | 6 | 0.685 | 5.9999986 |
| 34 | 1.5 | 5 | 0.429687 | 5.0000162 | 5 | 0.859374 | 4.9999585 |
| 35 | 1.5 | 5.5 | 0.8984375 | 5.499999 | 5.5 | 0.8984375 | 5.499999 |
| 36 | 1.5 | 6 | 0.859375 | 5.9076233 | 5 | 0.859375 | 5.0009999 |
| 37 | 1 | 6 | 0.8984375 | 5.9999981 | 6 | 0.8984375 | 5.9999995 |
| 38 | 1.5 | 6 | 0.4688 | 5.9999986 | 6 | 0.46875 | 6.0000978 |
| 39 | 3 | 6 | 0.8203125 | 5.999999 | 6 | 0.4101563 | 5.999999 |
| 40 | 1.5 | 6 | 0.4492188 | 5.999999 | 6 | 0.4492188 | 5.999999 |
| 41 | 1.5 | 6 | 0.4492188 | 6 | 6 | 0.4492188 | 6 |
| 42 | 1.5 | 6 | 0.4492188 | 6.0000014 | 5 | 0.9375 | 5 |
| 43 | 1.5 | 6.5 | 0.859383 | 6.4999361 | 6.5 | 0.859383 | 6.4999361 |
| 44 | 1.49 | 6.5 | 0.8984375 | 6.4999986 | 6 | 0.8984375 | 5.9999995 |
| 45 | 3 | 6.5 | 0.46875 | 6.5 | 6.5 | 0.46875 | 6.5 |
| 46 | 3 | 6.5 | 0.46875 | 6.5 | 6.5 | 0.46875 | 6.5 |
| 47 | 3 | 6.5 | 0.46875 | 6.5 | 6.5 | 0.46875 | 6.5 |
| 48 | 1.5 | 6.5 | 0.78125 | 6.5 | 6.5 | 0.78125 | 6.5 |
| 49 | 1.5 | 6.5 | 0.78125 | 6.5 | 6.5 | 0.78125 | 6.5 |
| 50 | 1.5 | 6.5 | 0.78125 | 6.5 | 6.5 | 0.78125 | 6.5 |
| 51 | 1.5 | 6.5 | 0.78125 | 6.5 | 6.5 | 0.78125 | 6.5 |
| 52 | 1.5 | 6.5 | 0.78125 | 6.5 | 6.5 | 0.78125 | 6.5 |
| 53 | 1.5 | 6.5 | 0.78125 | 6.5 | 6.5 | 0.78125 | 6.5 |
| 54 | 1.5 | 6.5 | 0.78125 | 6.5 | 6.5 | 0.78125 | 6.5 |
| 55 | 1.5 | 6.5 | 0.78125 | 6.5 | 6.5 | 0.78125 | 6.5 |
| 56 | 1.5 | 6.5 | 0.78125 | 6.5 | 6.5 | 0.78125 | 6.5 |
| 57 | 1.5 | 6.5 | 0.78125 | 6.5 | 6.5 | 0.78125 | 6.5 |
| 58 | 1.5 | 6.5 | 0.78125 | 6.5 | 6.5 | 0.78125 | 6.5 |
| 59 | 1.5 | 6.5 | 0.78125 | 6.5 | 6.5 | 0.78125 | 6.5 |
| 60 | 3 | 6.5 | 0.859375 | 6.5 | 6.5 | 0.859375 | 6.5 |
| 61 | 1.494 | 6.5 | 0.4492188 | 6.500001 | 6.5 | 0.5989583 | 6.5000014 |
| 62 | 3 | 6.5 | 0.859375 | 6.5000648 | 6.5 | 0.859375 | 6.5000648 |
| 63 | 1.5 | 7 | 0.9570313 | 7.0000005 | 7 | 0.9570313 | 7.0000005 |
| 64 | 1.5 | 7.25 | 0.8984375 | 7.2500005 | 7.25 | 0.8984375 | 7.2500005 |
| 65 | 2.89362 | 7.5 | 0.5729167 | 7.499999 | 7.5 | 0.6875 | 7.499999 |
| 66 | 1.49 | NA | 0.5078125 | 1.5 | 2.5 | 0.859375 | 7.5 |
| 67 | 1.49 | NA | 0.4882813 | 2 | 6.25 | 0.4492188 | 6.25 |
| 68 | 1.5 | NA | 0.9375 | 3 | 3 | 0.9375 | 3 |
| 69 | NA | NA | 0.938 | 3 | NA | 0.938 | 3 |
| 70 | NA | NA | 0.938 | 3 | NA | 0.938 | 3 |
| 71 | NA | NA | 0.938 | 3 | NA | 0.938 | 3 |
| 72 | NA | NA | 0.938 | 3 | NA | 0.938 | 3 |
| 73 | 1.49 | NA | 0.859375 | 7.5000052 | 2.5 | 0.859375 | 7.5000038 |
| 74 | 1.49 | NA | 0.9765625 | 8.2499866 | 3.25 | 0.9765625 | 8.2499866 |
| 75 | 1.5 | 3 | 0.93750 | 3 | 3 | 0.93750 | 3 |
| 76 | 1.5 | 3 | 0.93750 | 3 | 3 | 0.93750 | 3 |
| 77 | 1.5 | 7.5 | 0.89843 | 5 | 7.5 | 0.89843 | 5 |
| 78 | 1.5 | 7 | 0.89843 | 5 | 7 | 0.89843 | 5 |
| 79 | 3 | 2.5 | 0.4688 | 2.5 | 2.5 | 0.4688 | 2.5 |

| **ID** | **Magnetic Field** | **AX T1 POST** | | | **AX FLAIR** | | |
| --- | --- | --- | --- | --- | --- | --- | --- |
| **Strength (Tesla)** | **Gap (mm)** | **in plane voxel size (mm)** | **slice thickness (mm)** | **Gap (mm)** | **in plane voxel size (mm)** | **slice thickness (mm)** |
| **1** | 1.5 | 2.5 | 0.8593750 | 5 | 2.5 | 0.8593750 | 5 |
| **2** | 1.5 | 7.5 | 0.8593750 | 5 | 6 | 0.8593750 | 5 |
| **3** | 1.5 | 2.5 | 0.8593750 | 5 | 2.5 | 0.8984375 | 5 |
| **4** | 1.5 | 2.5 | 0.8593750 | 5 | 2.5 | 0.4296875 | 5 |
| **5** | 1.5 | 2.5 | 0.8593750 | 5 | 2.5 | 0.8203125 | 5 |
| **6** | 1.5 | 2.6 | 0.9375 | 5.2 | 6 | 0.859375 | 5 |
| **7** | 1.5 | 7.5 | 0.78125 | 5 | 6 | 0.78125 | 5 |
| **8** | 1.5 | 5 | 0.781250 | 4 | 3 | 0.781250 | 3 |
| **9** | NA | 3 | 0.938 | 3 | 3 | 0.938 | 3 |
| **10** | NA | 3 | 0.938 | 3 | 3 | 0.938 | 3 |
| **11** | NA | 3 | 0.938 | 3 | 3 | 0.938 | 3 |
| **12** | NA | 3 | 0.94 | 3 | 3 | 0.938 | 3 |
| **13** | 1.5 | 3 | 0.937 | 3 | 3 | 0.937 | 3 |
| **14** | 1.5 | 3 | 0.937 | 3 | 3 | 0.937 | 3 |

**Supplementary Table 2:** Significantly associated MRI derived texture features with *POSTN* gene expression in mice.

| S. No. | Feature Selected | Level | Volume Normalization | Invariance Metric | Feature Name |
| --- | --- | --- | --- | --- | --- |
| 1 | ed_F297 | 256 |  | angular variance | Information Measure of correlation 1 |
| 2 | GBMV_F236 | 64 | Y | angular variance | Difference Entropy |
| 3 | ed_F276 | 256 |  | range | Difference Entropy |
| 4 | en_F257 | 256 |  | mean | Information Measure of correlation 1 |
| 5 | ed_F274 | 256 |  | range | Sum Entropy |
| 6 | edV_F45 | 8 | Y | angular variance | Cluster Shade |
| 7 | enV_F124 | 32 | Y | mean | Cluster Prominence |
| 8 | ed_F125 | 32 |  | mean | Cluster Shade |
| 9 | edV_F216 | 64 | Y | range | Difference Entropy |
| 10 | en_F84 | 16 |  | range | Cluster Prominence |
| 11 | edV_T70 | 16 | Y | mean | Maximum Probability |
| 12 | ed_F2 | 8 |  | mean | Contrast |
| 13 | GBMFO_F1 |  |  |  | Minimum |
| 14 | ed_F90 | 16 |  | range | Maximum Probability |
| 15 | ed_F7 | 8 |  | mean | Energy |
| 16 | GBM_F77 | 16 |  | mean | Information Measure of correlation 1 |
| 17 | ed_F45 | 8 |  | angular variance | Cluster Shade |

Features with ‘fo’ in ‘Feature selected’ column represent features from first order statistics.

**Supplementary Table 3:** Significantly associated MRI derived texture features with *POSTN* gene expression in TCGA and Rembrandt patients.

| S. No. | Features Selected | Level | | Volume Normalization | Invariant Metric | | Feature Name |
| --- | --- | --- | --- | --- | --- | --- | --- |
| 1 | necV_T142 | | 32 | Y | | range | Contrast |
| 2 | necV_T213 | | 64 | Y | | range | Sum Variance |
| 3 | nec_T255 | | 256 |  | | average | Difference Entropy |
| 4 | necV_T113 | | 16 | Y | | angular variance | Sum Variance |
| 5 | nec_F216 | | 64 |  | | range | Difference Entropy |
| 6 | enV_T247 | | 256 | Y | | average | Energy |
| 7 | nec_F116 | | 16 |  | | angular variance | Difference Entropy |
| 8 | ed_T174 | | 32 |  | | angular variance | Sum Entropy |
| 9 | en_T246 | | 256 |  | | average | Dissimilarity |
| 10 | edFO_F10 | |  |  | |  | Kurtosis |
| 11 | en_T249 | | 256 |  | | average | Homogeneity |
| 12 | GBMFO_T9 | |  |  | |  | Skweness |
| 13 | edV_F29 | | 8 | Y | | range | Homogeneity |
| 14 | nec_T159 | | 32 |  | | range | Inverse difference normalized (INN) |
| 15 | edV_T163 | | 32 | Y | | angular variance | Correlation |
| 16 | ed_T10 | | 8 |  | | average | Maximum Probability |
| 17 | nec_F32 | | 8 |  | | range | Sum Average |
| 18 | GBM_T150 | | 32 |  | | range | Maximum Probability |
| 19 | GBMV_T63 | | 16 | Y | | average | Correlation |
| 20 | ed_F169 | | 32 |  | | angular variance | Homogeneity |
| 21 | ed_F7 | | 8 |  | | average | Energy |
| 22 | GBM_T151 | | 32 |  | | range | Sum of squares: Variance |
| 23 | ed_F146 | | 32 |  | | range | Dissimilarity |
| 24 | GBMV_F29 | | 8 | Y | | range | Homogeneity |
| 25 | GBMV_F274 | | 256 | Y | | range | Sum Entropy |
| 26 | enFO_F2 | |  |  | |  | Maximum |
| 27 | GBMV_F47 | | 8 | Y | | angular variance | Energy |
| 28 | enV_T169 | | 32 | Y | | angular variance | Homogeneity |
| 29 | enV_T123 | | 32 | Y | | average | Correlation |
| 30 | ed_T181 | | 64 |  | | average | Autocorrelation |
| 31 | ed_F21 | | 8 |  | | range | Autocorrelation |
| 32 | enV_T16 | | 8 | Y | | average | Difference Entropy |
| 33 | nec_F5 | | 8 |  | | average | Cluster Shade |
| 34 | edV_T45 | | 8 | Y | | angular variance | Cluster Shade |
| 35 | necFO_F9 | |  |  | |  | Skewness |
| 36 | necV_T269 | | 256 | Y | | range | Homogeneity |
| 37 | edV_T269 | | 256 | Y | | range | Homogeneity |
| 38 | enV_T3 | | 8 | Y | | average | Correlation |
| 39 | en_F86 | | 16 |  | | range | Dissimilarity |
| 40 | en_F67 | | 16 |  | | average | Energy |
| 41 | nec_T122 | | 32 |  | | average | Contrast |
| 42 | ed_F257 | | 256 |  | | average | Information measure of correlation 1 |
| 43 | edFO_F4 | |  |  | |  |  |
| 44 | ed_F100 | | 16 |  | | angular variance | Inverse difference moment normalized |
| 45 | necFO_T7 | |  |  | |  |  |
| 46 | necV_F256 | | 256 | Y | | average | Difference Entropy |
| 47 | necV_F262 | | 256 | Y | | range | Contrast |
| 48 | en_T44 | | 8 |  | | angular variance | Cluster Prominence |

Features with ‘FO’ in ‘Feature selected’ column represent features from first order statistics.
